# Supplementary material for: Role of Lewis acid/base anchor atoms in catalyst regeneration: a comprehensive study on biomimetic EP3Fe nitrogenases
Source: Royal Society of Chemistry journal article supplement (doi:10.1039/d4cp00483c), 2024-01-01
Supplement: d4cp00483c2.pdf [file d4cp00483c2.pdf]

# Supporting Information

## Role of Lewis Acid/Base Anchor Atoms in Catalyst Regeneration: A Comprehensive Study on Biomimetic EP<sub>3</sub>Fe Nitrogenases

*Joseph Kfoury<sup>†</sup> and Julianna Oláh<sup>†\*</sup>*

*\*Corresponding author. Email: olah.julianna@ybk.bme.hu*

<sup>†</sup> Department of Inorganic and Analytical Chemistry, Budapest University of Technology and Economics, Szent Gellért tér 4, 1111 Budapest, Hungary

### Contents

|                                                                                                                                                |           |
|------------------------------------------------------------------------------------------------------------------------------------------------|-----------|
| <b>1. Theoretical section (sample input files ORCA 4.1.2 ) .....</b>                                                                           | <b>S2</b> |
| <b>2. Computation of Gibbs free energies (G), bond lengths, ADCH charges, cDFT indices, binding affinities (A), and orbital energies .....</b> | <b>S3</b> |

## 1. Theoretical section (sample input files ORCA 4.1.2)

### Geometry optimization

```
!PAL [number of processors]
! RI BP86 ZORA ZORA-def2-SVP def2/J d3bj VerySlowConv tightscf Opt Freq
%scf MaxIter 1500 end
%method Z_tol 1e-6 end
%freq Temp 195 end
```

```
* xyz [charge] [multiplicity]
[initial guess of geometry]
*
```

### Single-point energy calculations (in diethyl ether solution)

```
!PAL [number of processors]
! RIJCOSX wB97X-D3 ZORA ZORA-def2-TZVP def2/J CPCM
%scf MaxIter 500 end
%method Z_tol 1e-6 end
%freq Temp 195 end
%cpcm smd true SMDsolvent "diethyl ether" end
```

```
* xyz [charge] [multiplicity]
[optimized geometry]
*
```

### Verification of methodology

Table S1 . Comparison of bond lengths and angles calculated at BP86 and  $\omega$ B97X-D3 levels of theory

| Structure          | <u>BP86 geometry</u>                |      |      |      |                   |     |     | <u><math>\omega</math>B97X-D3 geometry</u> |      |      |      |                    |     |     |
|--------------------|-------------------------------------|------|------|------|-------------------|-----|-----|--------------------------------------------|------|------|------|--------------------|-----|-----|
|                    | Bond distances (d) in Å             |      |      |      |                   |     |     | Bond distances (d) in Å                    |      |      |      |                    |     |     |
|                    | Bond angles ( $\alpha$ ) in degrees |      |      |      |                   |     |     | Bond angles ( $\alpha$ ) in degrees        |      |      |      |                    |     |     |
|                    | Fe-P                                |      |      | Fe-X | $\alpha$ (P-Fe-P) |     |     | Fe-P                                       |      |      | Fe-X | $\alpha$ (P-Fe-P)) |     |     |
| PP <sub>3</sub> Fe | 2.21                                | 2.20 | 2.21 | 2.09 | 115               | 113 | 131 | 2.25                                       | 2.23 | 2.24 | 2.10 | 116                | 114 | 128 |
| NP <sub>3</sub> Fe | 2.21                                | 2.18 | 2.18 | 2.33 | 115               | 113 | 129 | 2.25                                       | 2.18 | 2.20 | 2.29 | 120                | 117 | 123 |

## 2. Computation of molecular Gibbs free energies (G), bond lengths, ADCH charges, cDFT indices, and binding affinities (A)

### 2.1. Equations utilised

#### Calculation of Molecular Gibbs Free Energy:

The Gibbs free energy (G) was calculated for each molecule by adding the single-point electronic energy ( $E_{\omega B97X-D3}$ ) to the thermal correction to Gibbs free energy resulting from vibration analysis ( $(G - E)_{BP86}$ ):

$$G = E_{\omega B97X-D3} + (G - E)_{BP86} \quad (1)$$

Thermal corrections were computed at 195 K temperature and 1 atm pressure, corresponding to the typically applied experimental conditions.<sup>21</sup>

The Gibbs free energies computed in the gas phase were then corrected to account for different concentrations using the following equation:

$$G(c = x M) = G(c = 0.0625 M) + RT \times \ln \frac{Q(c = x M)}{Q(c = 0.0625 M)} \quad (2)$$

The molar concentration is given in parenthesis;  $x$  represents the molar concentration at which the Gibbs free energy is to be calculated, and  $Q$  represents the reaction quotient. This formula gives a correction of -1.28 kcal/mol in the case of  $\text{NH}_3$  release, and a correction of +1.28 kcal/mol in  $\text{N}_2$  coordination steps ( $x = 2.3 \text{ mM}$  was used as this is the experimental concentration of the catalyst that resulted in the highest turnover number).<sup>24</sup>

The highest turnover number observed was in the presence of 162 mol equiv of reductant and 322 mol equiv of acid,<sup>24</sup> and after replacing these values into equation 2, we get a correction of 1.97 kcal/mol to be subtracted from the Gibbs free energy of electron addition steps, and a correction of 2.24 kcal/mol to be subtracted from the Gibbs free energy of proton addition steps.

#### Calculation of Conceptual Density Functional Theory (cDFT) indices:

Conceptual Density Functional Theory (cDFT) offers a framework for understanding molecular behavior using electronic densities, providing insights into reactivity, allowing for predictive and interpretative analyses.<sup>49</sup>

The electronegativity index is defined according to the following equation:<sup>50</sup>

$$\chi^- = E(N - 1) - E(N) = I \quad (3)$$

$$\chi^+ = E(N) - E(N + 1) = A \quad (4)$$

$$\chi = \frac{\chi^- + \chi^+}{2} = \frac{I + A}{2} \quad (5)$$

Where N refers to the number of electrons carried by the chemical system at its most stable status, and I and A are the ionizing energy and the electron affinity of the neutral atom respectively. This formula is the same as proposed by Mulliken to calculate electronegativity.<sup>49,50</sup>

The hardness ( $\eta$ ) is defined according to the following equation:<sup>51</sup>

$$\eta = I - A \quad (6)$$

Softness, S is considered as the reciprocal of the hardness:

$$S = \frac{1}{\eta} \quad (7)$$

The electrophilicity index ( $\omega$ ) is defined according to the following equation:<sup>49,52</sup>

$$\omega = \frac{\mu^2}{2\eta} \quad (8)$$

Where  $\mu$  is the electronic chemical potential which is calculated by multiplying the electronegativity ( $\chi$ ) by a minus.

### **Calculation of Binding Affinities (Gibbs Free Energies of N<sub>2</sub> and H<sub>2</sub> Coordination):**

The affinity (A) of a small X<sub>2</sub> molecule (i. e. N<sub>2</sub> or H<sub>2</sub>) to the iron center can be quantified by the negative Gibbs free energy change (- $\Delta G$ ) of the reaction EP<sub>3</sub>Fe + X<sub>2</sub> → EP<sub>3</sub>Fe-X<sub>2</sub>, which derives from the molecular Gibbs free energies (G) as:

$$A_{X_2} = -\Delta G_{EP_3Fe + X_2 \rightarrow Fe-X_2} = G_{EP_3Fe} + G_{X_2} - G_{EP_3Fe-X_2} \quad (9)$$

## 2.2. Gibbs free energy calculations

**Table S2 .** Calculation of Gibbs free energy required for proton, electron and hydrogen atom release from the acid, reductant and PCET reagent, respectively. All energies are in Hartree if otherwise not stated.  $\Delta G$  values were calculated based on the following equations:

$$\Delta G(\text{H}^+) = G(\text{Ph}_2\text{NH}) - G(\text{Ph}_2\text{NH}_2^+)$$

$$\Delta G(\text{e}^-) = G(\text{Cp}_2^*\text{Co}^+) - G(\text{Cp}_2^*\text{Co})$$

$$\Delta G(\text{H}) = G(\text{Cp}_2^*\text{Co}^+) - G((\text{Cp}^*\text{CoC}_5\text{Me}_5\text{H})^+)$$

$$\Delta G(\text{NH}_3 \rightarrow \text{NH}_4^+) = G(\text{NH}_4^+) - G(\text{NH}_3) + \Delta G(\text{H}^+)$$

| Molecule                                             | E<br>[Ha]    | G-E<br>[Ha] | G<br>[Ha]    | $\Delta G$<br>[kcal/mol] |
|------------------------------------------------------|--------------|-------------|--------------|--------------------------|
| Ph <sub>2</sub> NH <sub>2</sub> <sup>+</sup>         | -519.689217  | 0.186134    | -519.503083  |                          |
| Ph <sub>2</sub> NH                                   | -519.262565  | 0.172803    | -519.089762  |                          |
| <b>H<sup>+</sup> release</b>                         |              |             |              | <b>259.36</b>            |
| Cp <sub>2</sub> *Co                                  | -2180.525088 | 0.403473    | -2180.121616 |                          |
| Cp <sub>2</sub> *Co <sup>+</sup>                     | -2180.419405 | 0.409662    | -2180.009742 |                          |
| <b>e<sup>-</sup> release</b>                         |              |             |              | <b>70.20</b>             |
| (Cp*CoC <sub>5</sub> Me <sub>5</sub> H) <sup>+</sup> | -2180.974838 | 0.418081    | -2180.556757 |                          |
| Cp <sub>2</sub> *Co <sup>+</sup>                     | -2180.419405 | 0.409662    | -2180.009742 |                          |
| <b>H atom release</b>                                |              |             |              | <b>343.25</b>            |
| NH <sub>3</sub>                                      | -56.643965   | 0.022744    | -56.621221   |                          |
| NH <sub>4</sub> <sup>+</sup>                         | -57.090538   | 0.03717650  | -57.053362   |                          |
| <b>NH<sub>3</sub> → NH<sub>4</sub><sup>+</sup></b>   |              |             |              | <b>-11.81</b>            |

**Table S3 .** Gibbs free energies and relative Gibbs free energy data of the intermediates in the catalytic cycle of BP<sub>3</sub>FeN<sub>2</sub><sup>-</sup>. Relative Gibbs free energies  $G_{\text{rel}}$  were calculated based on the following equation:

$$G_{\text{rel}}[\text{kcal/mol}] = G - G(\text{BP}_3\text{FeN}_2^-) + n_{\text{H}^+}[\Delta G(\text{H}^+) - 2.24] + n_{\text{e}^-}[\Delta G(\text{e}^-) - 1.97] + n_{\text{NH}_3}[\Delta G(\text{NH}_3) - 1.28 + \Delta G(\text{NH}_3 \rightarrow \text{NH}_4^+) - 2.24] - n_{\text{N}_2}[\Delta G(\text{N}_2) - 1.28]$$

where  $G$ ,  $G(\text{BP}_3\text{FeN}_2^-)$ ,  $G(\text{NH}_3)$  and  $G(\text{N}_2)$  denote the Gibbs free energy of a given intermediate (in the most stable spin state), the catalyst (BP<sub>3</sub>FeN<sub>2</sub><sup>-</sup>), the ammonia molecule and the dinitrogen molecule, respectively;  $\Delta G(\text{H}^+)$ ,  $\Delta G(\text{e}^-)$  and  $\Delta G(\text{NH}_3 \rightarrow \text{NH}_4^+)$  represent the Gibbs free energy of proton release, electron release and ammonia protonation, respectively, the calculation of which is presented in Table S;  $n_{\text{H}^+}$ ,  $n_{\text{e}^-}$ ,  $n_{\text{NH}_3}$  and  $n_{\text{N}_2}$  stand for the number of particles added to (H<sup>+</sup>, e<sup>-</sup>, N<sub>2</sub>) or released from (NH<sub>3</sub>) the initial catalyst complex until the given intermediate is formed.

Numerical corrections account for the liquid-phase concentrations and the excess amount of acid and reductant.

| Complex                                         | Spin State | $\Delta G_{\text{rel}}$<br>[kcal/mol] |
|-------------------------------------------------|------------|---------------------------------------|
| BP <sub>3</sub> FeN <sub>2</sub> <sup>-</sup>   | 2          | 0                                     |
| BP <sub>3</sub> FeNNH                           | 4          | -29.5                                 |
| BP <sub>3</sub> FeNNH <sub>2</sub> <sup>+</sup> | 4          | -58.0                                 |
| BP <sub>3</sub> FeNNH <sub>2</sub>              | 3          | -68.7                                 |
| BP <sub>3</sub> FeNNH <sub>3</sub> <sup>+</sup> | 5          | -80.1                                 |
| BP <sub>3</sub> FeN <sup>+</sup>                | 1          | -130.5                                |
| BP <sub>3</sub> FeN                             | 2          | -151.5                                |
| BP <sub>3</sub> FeNH <sup>+</sup>               | 6          | -184.9                                |
| BP <sub>3</sub> FeNH                            | 5          | -210.4                                |
| BP <sub>3</sub> FeNH <sub>2</sub> <sup>+</sup>  | 5          | -270.3                                |
| BP <sub>3</sub> FeNH <sub>2</sub>               | 4          | -290.6                                |
| BP <sub>3</sub> FeNH <sub>3</sub> <sup>+</sup>  | 4          | -334.8                                |
| BP <sub>3</sub> Fe <sup>+</sup>                 | 4          | -355.8                                |
| BP <sub>3</sub> Fe                              | 3          | -361.4                                |

|                                               |   |        |
|-----------------------------------------------|---|--------|
| BP <sub>3</sub> FeN <sub>2</sub>              | 3 | -361.9 |
| BP <sub>3</sub> FeN <sub>2</sub> <sup>-</sup> | 2 | -338.6 |

**Table S4 .** Gibbs free energies and relative Gibbs free energy data of the intermediates in the catalytic cycle of NP<sub>3</sub>FeN<sub>2</sub><sup>-</sup>. Relative Gibbs free energies G<sub>rel</sub> were calculated based on the following equation:

$$G_{rel}[\text{kcal/mol}] = G - G(\text{NP}_3\text{FeN}_2^-) + n_{\text{H}^+}[\Delta G(\text{H}^+) - 2.24] + n_{\text{e}^-}[\Delta G(\text{e}^-) - 1.97] + n_{\text{NH}_3}.[G(\text{NH}_3) - 1.28 + \Delta G(\text{NH}_3 \rightarrow \text{NH}_4^+) - 2.24] - n_{\text{N}_2}.[G(\text{N}_2) - 1.28]$$

where G, G(NP<sub>3</sub>FeN<sub>2</sub><sup>-</sup>), G(NH<sub>3</sub>) and G(N<sub>2</sub>) denote the Gibbs free energy of a given intermediate (in the most stable spin state), the catalyst (NP<sub>3</sub>FeN<sub>2</sub><sup>-</sup>), the ammonia molecule and the dinitrogen molecule, respectively; ΔG(H<sup>+</sup>), ΔG(e<sup>-</sup>) and ΔG(NH<sub>3</sub> → NH<sub>4</sub><sup>+</sup>) represent the Gibbs free energy of proton release, electron release and ammonia protonation, respectively, the calculation of which is presented in Table S; n<sub>H<sup>+</sup></sub>, n<sub>e<sup>-</sup></sub>, n<sub>NH<sub>3</sub></sub> and n<sub>N<sub>2</sub></sub> stand for the number of particles added to (H<sup>+</sup>, e<sup>-</sup>, N<sub>2</sub>) or released from (NH<sub>3</sub>) the initial catalyst complex until the given intermediate is formed. Numerical corrections account for the liquid-phase concentrations and the excess amount of acid and reductant.

| Complex                                         | Spin State | ΔG <sub>rel</sub><br>[kcal/mol] |
|-------------------------------------------------|------------|---------------------------------|
| NP <sub>3</sub> FeN <sub>2</sub> <sup>-</sup>   | 4          | 0                               |
| NP <sub>3</sub> FeNNH                           | 4          | -60.8                           |
| NP <sub>3</sub> FeNNH <sub>2</sub> <sup>+</sup> | 4          | -110.5                          |
| NP <sub>3</sub> FeNNH <sub>2</sub>              | 1          | -94.2                           |
| NP <sub>3</sub> FeNNH <sub>3</sub> <sup>+</sup> | 5          | -130.4                          |
| NP <sub>3</sub> FeN <sup>+</sup>                | 1          | -192.3                          |
| NP <sub>3</sub> FeN                             | 2          | -179.4                          |
| NP <sub>3</sub> FeNH <sup>+</sup>               | 6          | -242.1                          |
| NP <sub>3</sub> FeNH                            | 5          | -244.9                          |
| NP <sub>3</sub> FeNH <sub>2</sub> <sup>+</sup>  | 5          | -326.9                          |
| NP <sub>3</sub> FeNH <sub>2</sub>               | 4          | -320.6                          |
| NP <sub>3</sub> FeNH <sub>3</sub> <sup>+</sup>  | 4          | -379.5                          |
| NP <sub>3</sub> Fe <sup>+</sup>                 | 4          | -402.8                          |
| NP <sub>3</sub> Fe                              | 3          | -378.2                          |
| NP <sub>3</sub> FeN <sub>2</sub>                | 3          | -385.8                          |
| NP <sub>3</sub> FeN <sub>2</sub> <sup>-</sup>   | 4          | -338.6                          |

**Table S5 .** Gibbs free energies and relative Gibbs free energy data of the intermediates in the catalytic cycle of AIP<sub>3</sub>FeN<sub>2</sub><sup>-</sup>. Relative Gibbs free energies G<sub>rel</sub> were calculated based on the following equation:

$$G_{rel}[\text{kcal/mol}] = G - G(\text{AIP}_3\text{FeN}_2^-) + n_{\text{H}^+}[\Delta G(\text{H}^+) - 2.24] + n_{\text{e}^-}[\Delta G(\text{e}^-) - 1.97] + n_{\text{NH}_3}.[G(\text{NH}_3) - 1.28 + \Delta G(\text{NH}_3 \rightarrow \text{NH}_4^+) - 2.24] - n_{\text{N}_2}.[G(\text{N}_2) - 1.28]$$

where G, G(AIP<sub>3</sub>FeN<sub>2</sub><sup>-</sup>), G(NH<sub>3</sub>) and G(N<sub>2</sub>) denote the Gibbs free energy of a given intermediate (in the most stable spin state), the catalyst (AIP<sub>3</sub>FeN<sub>2</sub><sup>-</sup>), the ammonia molecule and the dinitrogen molecule, respectively; ΔG(H<sup>+</sup>), ΔG(e<sup>-</sup>) and ΔG(NH<sub>3</sub> → NH<sub>4</sub><sup>+</sup>) represent the Gibbs free energy of proton release, electron release and ammonia protonation, respectively, the calculation of which is presented in Table S; n<sub>H<sup>+</sup></sub>, n<sub>e<sup>-</sup></sub>, n<sub>NH<sub>3</sub></sub> and n<sub>N<sub>2</sub></sub> stand for the number of particles added to (H<sup>+</sup>, e<sup>-</sup>, N<sub>2</sub>) or released from (NH<sub>3</sub>) the initial catalyst complex until the given intermediate is formed. Numerical corrections account for the liquid-phase concentrations and the excess amount of acid and reductant.

| Complex                                        | Spin State | ΔG <sub>rel</sub><br>[kcal/mol] |
|------------------------------------------------|------------|---------------------------------|
| AIP <sub>3</sub> FeN <sub>2</sub> <sup>-</sup> | 2          | 0                               |
| AIP <sub>3</sub> FeNNH                         | 4          | -24.3                           |

|                                                  |   |        |
|--------------------------------------------------|---|--------|
| AlP <sub>3</sub> FeNNH <sub>2</sub> <sup>+</sup> | 4 | -56.7  |
| AlP <sub>3</sub> FeNNH <sub>2</sub>              | 3 | -62.0  |
| AlP <sub>3</sub> FeNNH <sub>3</sub> <sup>+</sup> | 5 | -80.2  |
| AlP <sub>3</sub> FeN <sup>+</sup>                | 1 | -120.3 |
| AlP <sub>3</sub> FeN                             | 2 | -146.9 |
| AlP <sub>3</sub> FeNH <sup>+</sup>               | 6 | -183.5 |
| AlP <sub>3</sub> FeNH                            | 5 | -206.4 |
| AlP <sub>3</sub> FeNH <sub>2</sub> <sup>+</sup>  | 5 | -267.0 |
| AlP <sub>3</sub> FeNH <sub>2</sub>               | 4 | -291.0 |
| AlP <sub>3</sub> FeNH <sub>3</sub> <sup>+</sup>  | 4 | -333.0 |
| AlP <sub>3</sub> Fe <sup>+</sup>                 | 4 | -351.7 |
| AlP <sub>3</sub> Fe                              | 3 | -358.8 |
| AlP <sub>3</sub> FeN <sub>2</sub>                | 3 | -361.0 |
| AlP <sub>3</sub> FeN <sub>2</sub> <sup>-</sup>   | 2 | -338.6 |

**Table S6 .** Gibbs free energies and relative Gibbs free energy data of the intermediates in the catalytic cycle of GaP<sub>3</sub>FeN<sub>2</sub><sup>-</sup>. Relative Gibbs free energies  $G_{rel}$  were calculated based on the following equation:

$$G_{rel}[\text{kcal/mol}] = G - G(\text{GaP}_3\text{FeN}_2^-) + n_{\text{H}^+} \cdot [\Delta G(\text{H}^+) - 2.24] + n_{e^-} \cdot [\Delta G(e^-) - 1.97] + n_{\text{NH}_3} \cdot [G(\text{NH}_3) - 1.28 + \Delta G(\text{NH}_3 \rightarrow \text{NH}_4^+) - 2.24] - n_{\text{N}_2} \cdot [G(\text{N}_2) - 1.28]$$

where  $G$ ,  $G(\text{GaP}_3\text{FeN}_2^-)$ ,  $G(\text{NH}_3)$  and  $G(\text{N}_2)$  denote the Gibbs free energy of a given intermediate (in the most stable spin state), the catalyst ( $\text{GaP}_3\text{FeN}_2^-$ ), the ammonia molecule and the dinitrogen molecule, respectively;  $\Delta G(\text{H}^+)$ ,  $\Delta G(e^-)$  and  $\Delta G(\text{NH}_3 \rightarrow \text{NH}_4^+)$  represent the Gibbs free energy of proton release, electron release and ammonia protonation, respectively, the calculation of which is presented in Table S;  $n_{\text{H}^+}$ ,  $n_{e^-}$ ,  $n_{\text{NH}_3}$  and  $n_{\text{N}_2}$  stand for the number of particles added to ( $\text{H}^+$ ,  $e^-$ ,  $\text{N}_2$ ) or released from ( $\text{NH}_3$ ) the initial catalyst complex until the given intermediate is formed. Numerical corrections account for the liquid-phase concentrations and the excess amount of acid and reductant.

| Complex                                          | Spin State | $\Delta G_{rel}$<br>[kcal/mol] |
|--------------------------------------------------|------------|--------------------------------|
| GaP <sub>3</sub> FeN <sub>2</sub> <sup>-</sup>   | 2          | 0                              |
| GaP <sub>3</sub> FeNNH                           | 4          | -25.5                          |
| GaP <sub>3</sub> FeNNH <sub>2</sub> <sup>+</sup> | 4          | -57.8                          |
| GaP <sub>3</sub> FeNNH <sub>2</sub>              | 3          | -61.6                          |
| GaP <sub>3</sub> FeNNH <sub>3</sub> <sup>+</sup> | 5          | -80.3                          |
| GaP <sub>3</sub> FeN <sup>+</sup>                | 1          | -123.1                         |
| GaP <sub>3</sub> FeN                             | 2          | -147.2                         |
| GaP <sub>3</sub> FeNH <sup>+</sup>               | 6          | -185.2                         |
| GaP <sub>3</sub> FeNH                            | 5          | -207.3                         |
| GaP <sub>3</sub> FeNH <sub>2</sub> <sup>+</sup>  | 5          | -268.1                         |
| GaP <sub>3</sub> FeNH <sub>2</sub>               | 4          | -290.3                         |
| GaP <sub>3</sub> FeNH <sub>3</sub> <sup>+</sup>  | 4          | -332.9                         |
| GaP <sub>3</sub> Fe <sup>+</sup>                 | 4          | -352.1                         |
| GaP <sub>3</sub> Fe                              | 3          | -357.3                         |
| GaP <sub>3</sub> FeN <sub>2</sub>                | 3          | -358.7                         |
| GaP <sub>3</sub> FeN <sub>2</sub> <sup>-</sup>   | 2          | -338.6                         |

**Table S7 .** Gibbs free energies and relative Gibbs free energy data of the intermediates in the catalytic cycle of PP<sub>3</sub>FeN<sub>2</sub><sup>-</sup>. Relative Gibbs free energies  $G_{rel}$  were calculated based on the following equation:

$$G_{\text{rel}}[\text{kcal/mol}] = G - G(\text{PP}_3\text{FeN}_2^-) + n_{\text{H}^+}[\Delta G(\text{H}^+) - 2.24] + n_{\text{e}^-}[\Delta G(\text{e}^-) - 1.97] + n_{\text{NH}_3}[\Delta G(\text{NH}_3 \rightarrow \text{NH}_4^+) - 2.24] - n_{\text{N}_2}[\Delta G(\text{N}_2) - 1.28]$$

where  $G$ ,  $G(\text{PP}_3\text{FeN}_2^-)$ ,  $G(\text{NH}_3)$  and  $G(\text{N}_2)$  denote the Gibbs free energy of a given intermediate (in the most stable spin state), the catalyst ( $\text{PP}_3\text{FeN}_2^-$ ), the ammonia molecule and the dinitrogen molecule, respectively;  $\Delta G(\text{H}^+)$ ,  $\Delta G(\text{e}^-)$  and  $\Delta G(\text{NH}_3 \rightarrow \text{NH}_4^+)$  represent the Gibbs free energy of proton release, electron release and ammonia protonation, respectively, the calculation of which is presented in Table S;  $n_{\text{H}^+}$ ,  $n_{\text{e}^-}$ ,  $n_{\text{NH}_3}$  and  $n_{\text{N}_2}$  stand for the number of particles added to ( $\text{H}^+$ ,  $\text{e}^-$ ,  $\text{N}_2$ ) or released from ( $\text{NH}_3$ ) the initial catalyst complex until the given intermediate is formed. Numerical corrections account for the liquid-phase concentrations and the excess amount of acid and reductant.

| Complex                       | Spin State | $\Delta G_{\text{rel}}$<br>[kcal/mol] |
|-------------------------------|------------|---------------------------------------|
| $\text{PP}_3\text{FeN}_2^-$   | 2          | 0                                     |
| $\text{PP}_3\text{FeNNH}$     | 2          | -45.5                                 |
| $\text{PP}_3\text{FeNNH}_2^+$ | 2          | -89.0                                 |
| $\text{PP}_3\text{FeNNH}_2$   | 1          | -68.7                                 |
| $\text{PP}_3\text{FeNNH}_3^+$ | 3          | -109.8                                |
| $\text{PP}_3\text{FeN}^+$     | 1          | -174.6                                |
| $\text{PP}_3\text{FeN}$       | 2          | -164.4                                |
| $\text{PP}_3\text{FeNH}^+$    | 2          | -226.9                                |
| $\text{PP}_3\text{FeNH}$      | 3          | -228.2                                |
| $\text{PP}_3\text{FeNH}_2^+$  | 3          | -308.0                                |
| $\text{PP}_3\text{FeNH}_2$    | 2          | -298.5                                |
| $\text{PP}_3\text{FeNH}_3^+$  | 2          | -356.9                                |
| $\text{PP}_3\text{Fe}^+$      | 4          | -384.7                                |
| $\text{PP}_3\text{Fe}$        | 3          | -372.6                                |
| $\text{PP}_3\text{FeN}_2$     | 1          | -382.6                                |
| $\text{PP}_3\text{FeN}_2^-$   | 2          | -338.6                                |

**Table S8** . Gibbs free energies and relative Gibbs free energy data of the intermediates in the catalytic cycle of (1-Cl) $\text{NP}_3\text{FeN}_2^-$ . Relative Gibbs free energies  $G_{\text{rel}}$  were calculated based on the following equation:

$$G_{\text{rel}}[\text{kcal/mol}] = G - G((1\text{-Cl})\text{NP}_3\text{FeN}_2^-) + n_{\text{H}^+}[\Delta G(\text{H}^+) - 2.24] + n_{\text{e}^-}[\Delta G(\text{e}^-) - 1.97] + n_{\text{NH}_3}[\Delta G(\text{NH}_3 \rightarrow \text{NH}_4^+) - 2.24] - n_{\text{N}_2}[\Delta G(\text{N}_2) - 1.28]$$

where  $G$ ,  $G((1\text{-Cl})\text{NP}_3\text{FeN}_2^-)$ ,  $G(\text{NH}_3)$  and  $G(\text{N}_2)$  denote the Gibbs free energy of a given intermediate (in the most stable spin state), the catalyst ( $(1\text{-Cl})\text{NP}_3\text{FeN}_2^-$ ), the ammonia molecule and the dinitrogen molecule, respectively;  $\Delta G(\text{H}^+)$ ,  $\Delta G(\text{e}^-)$  and  $\Delta G(\text{NH}_3 \rightarrow \text{NH}_4^+)$  represent the Gibbs free energy of proton release, electron release and ammonia protonation, respectively, the calculation of which is presented in Table S;  $n_{\text{H}^+}$ ,  $n_{\text{e}^-}$ ,  $n_{\text{NH}_3}$  and  $n_{\text{N}_2}$  stand for the number of particles added to ( $\text{H}^+$ ,  $\text{e}^-$ ,  $\text{N}_2$ ) or released from ( $\text{NH}_3$ ) the initial catalyst complex until the given intermediate is formed. Numerical corrections account for the liquid-phase concentrations and the excess amount of acid and reductant.

| Complex                                    | Spin State | $\Delta G_{\text{rel}}$<br>[kcal/mol] |
|--------------------------------------------|------------|---------------------------------------|
| $(1\text{-Cl})\text{NP}_3\text{FeN}_2^-$   | 2          | 0.0                                   |
| $(1\text{-Cl})\text{NP}_3\text{FeNNH}$     | 4          | -53.5                                 |
| $(1\text{-Cl})\text{NP}_3\text{FeNNH}_2^+$ | 4          | -99.5                                 |
| $(1\text{-Cl})\text{NP}_3\text{FeNNH}_2$   | 1          | -99.9                                 |
| $(1\text{-Cl})\text{NP}_3\text{FeNNH}_3^+$ | 1          | -141.4                                |
| $(1\text{-Cl})\text{NP}_3\text{FeN}^+$     | 1          | -177.1                                |
| $(1\text{-Cl})\text{NP}_3\text{FeN}$       | 2          | -175.4                                |
| $(1\text{-Cl})\text{NP}_3\text{FeNH}^+$    | 6          | -229.0                                |



|                                                      |   |        |
|------------------------------------------------------|---|--------|
| (1-Cl)NP <sub>3</sub> FeNH                           | 5 | -236.6 |
| (1-Cl)NP <sub>3</sub> FeNH <sub>2</sub> <sup>+</sup> | 5 | -315.0 |
| (1-Cl)NP <sub>3</sub> FeNH <sub>2</sub>              | 4 | -314.0 |
| (1-Cl)NP <sub>3</sub> FeNH <sub>3</sub> <sup>+</sup> | 4 | -369.0 |
| (1-Cl)NP <sub>3</sub> Fe <sup>+</sup>                | 4 | -386.5 |
| (1-Cl)NP <sub>3</sub> Fe                             | 3 | -369.7 |
| (1-Cl)NP <sub>3</sub> FeN <sub>2</sub>               | 3 | -378.7 |
| (1-Cl)NP <sub>3</sub> FeN <sub>2</sub> <sup>-</sup>  | 2 | -338.6 |

**Table S9.** Gibbs free energies and relative Gibbs free energy data of the intermediates in the catalytic cycle of (2-Cl)NP<sub>3</sub>FeN<sub>2</sub><sup>-</sup>. Relative Gibbs free energies  $G_{rel}$  were calculated based on the following equation:

$$G_{rel}[\text{kcal/mol}] = G - G((2\text{-Cl})\text{NP}_3\text{FeN}_2^-) + n_{\text{H}^+}[\Delta G(\text{H}^+) - 2.24] + n_{e^-}[\Delta G(e^-) - 1.97] + n_{\text{NH}_3} \cdot [G(\text{NH}_3) - 1.28 + \Delta G(\text{NH}_3 \rightarrow \text{NH}_4^+) - 2.24] - n_{\text{N}_2} \cdot [G(\text{N}_2) - 1.28]$$

where  $G$ ,  $G((2\text{-Cl})\text{NP}_3\text{FeN}_2^-)$ ,  $G(\text{NH}_3)$  and  $G(\text{N}_2)$  denote the Gibbs free energy of a given intermediate (in the most stable spin state), the catalyst ((2-Cl)NP<sub>3</sub>FeN<sub>2</sub><sup>-</sup>), the ammonia molecule and the dinitrogen molecule, respectively;  $\Delta G(\text{H}^+)$ ,  $\Delta G(e^-)$  and  $\Delta G(\text{NH}_3 \rightarrow \text{NH}_4^+)$  represent the Gibbs free energy of proton release, electron release and ammonia protonation, respectively, the calculation of which is presented in Table S;  $n_{\text{H}^+}$ ,  $n_{e^-}$ ,  $n_{\text{NH}_3}$  and  $n_{\text{N}_2}$  stand for the number of particles added to (H<sup>+</sup>, e<sup>-</sup>, N<sub>2</sub>) or released from (NH<sub>3</sub>) the initial catalyst complex until the given intermediate is formed. Numerical corrections account for the liquid-phase concentrations and the excess amount of acid and reductant.

| Complex                                               | Spin State | $\Delta G_{rel}$ [kcal/mol] |
|-------------------------------------------------------|------------|-----------------------------|
| (2-Cl)NP <sub>3</sub> FeN <sub>2</sub> <sup>-</sup>   | 4          | 0.0                         |
| (2-Cl)NP <sub>3</sub> FeNNH                           | 4          | -54.8                       |
| (2-Cl)NP <sub>3</sub> FeNNH <sub>2</sub> <sup>+</sup> | 4          | -102.0                      |
| (2-Cl)NP <sub>3</sub> FeNNH <sub>2</sub>              | 1          | -88.3                       |
| (2-Cl)NP <sub>3</sub> FeNNH <sub>3</sub> <sup>+</sup> | 1          | -146.8                      |
| (2-Cl)NP <sub>3</sub> FeN <sup>+</sup>                | 1          | -182.3                      |
| (2-Cl)NP <sub>3</sub> FeN                             | 2          | -172.2                      |
| (2-Cl)NP <sub>3</sub> FeNH <sup>+</sup>               | 6          | -232.8                      |
| (2-Cl)NP <sub>3</sub> FeNH                            | 5          | -238.9                      |
| (2-Cl)NP <sub>3</sub> FeNH <sub>2</sub> <sup>+</sup>  | 5          | -318.1                      |
| (2-Cl)NP <sub>3</sub> FeNH <sub>2</sub>               | 4          | -314.0                      |
| (2-Cl)NP <sub>3</sub> FeNH <sub>3</sub> <sup>+</sup>  | 4          | -371.8                      |
| (2-Cl)NP <sub>3</sub> Fe <sup>+</sup>                 | 4          | -391.8                      |
| (2-Cl)NP <sub>3</sub> Fe                              | 3          | -372.4                      |
| (2-Cl)NP <sub>3</sub> FeN <sub>2</sub>                | 3          | -379.6                      |
| (2-Cl)NP <sub>3</sub> FeN <sub>2</sub> <sup>-</sup>   | 4          | -338.6                      |

**Table S10.** Gibbs free energies and relative Gibbs free energy data of the intermediates in the catalytic cycle of (3-Cl)NP<sub>3</sub>FeN<sub>2</sub><sup>-</sup>. Relative Gibbs free energies  $G_{rel}$  were calculated based on the following equation:

$$G_{rel}[\text{kcal/mol}] = G - G((3\text{-Cl})\text{NP}_3\text{FeN}_2^-) + n_{\text{H}^+}[\Delta G(\text{H}^+) - 2.24] + n_{e^-}[\Delta G(e^-) - 1.97] + n_{\text{NH}_3} \cdot [G(\text{NH}_3) - 1.28 + \Delta G(\text{NH}_3 \rightarrow \text{NH}_4^+) - 2.24] - n_{\text{N}_2} \cdot [G(\text{N}_2) - 1.28]$$

where  $G$ ,  $G((3\text{-Cl})\text{NP}_3\text{FeN}_2^-)$ ,  $G(\text{NH}_3)$  and  $G(\text{N}_2)$  denote the Gibbs free energy of a given intermediate (in the most stable spin state), the catalyst ((3-Cl)NP<sub>3</sub>FeN<sub>2</sub><sup>-</sup>), the ammonia molecule and the dinitrogen molecule, respectively;  $\Delta G(\text{H}^+)$ ,  $\Delta G(e^-)$  and  $\Delta G(\text{NH}_3 \rightarrow \text{NH}_4^+)$  represent the Gibbs free energy of proton release, electron release and ammonia protonation, respectively, the calculation of which is presented in Table S;  $n_{\text{H}^+}$ ,  $n_{e^-}$ ,  $n_{\text{NH}_3}$  and  $n_{\text{N}_2}$  stand for the number of particles added to (H<sup>+</sup>, e<sup>-</sup>, N<sub>2</sub>) or released from (NH<sub>3</sub>) the initial catalyst complex until the given

intermediate is formed. Numerical corrections account for the liquid-phase concentrations and the excess amount of acid and reductant.

| Complex                                               | Spin State | $\Delta G_{\text{rel}}$ [kcal/mol] |
|-------------------------------------------------------|------------|------------------------------------|
| (3-Cl)NP <sub>3</sub> FeN <sub>2</sub> <sup>-</sup>   | 4          | 0.0                                |
| (3-Cl)NP <sub>3</sub> FeNNH                           | 4          | -50.4                              |
| (3-Cl)NP <sub>3</sub> FeNNH <sub>2</sub> <sup>+</sup> | 4          | -99.8                              |
| (3-Cl)NP <sub>3</sub> FeNNH <sub>2</sub>              | 3          | -88.1                              |
| (3-Cl)NP <sub>3</sub> FeNNH <sub>3</sub> <sup>+</sup> | 1          | -145.2                             |
| (3-Cl)NP <sub>3</sub> FeN <sup>+</sup>                | 1          | -180.7                             |
| (3-Cl)NP <sub>3</sub> FeN                             | 2          | -171.1                             |
| (3-Cl)NP <sub>3</sub> FeNH <sup>+</sup>               | 4          | -227.0                             |
| (3-Cl)NP <sub>3</sub> FeNH                            | 5          | -236.9                             |
| (3-Cl)NP <sub>3</sub> FeNH <sub>2</sub> <sup>+</sup>  | 5          | -315.9                             |
| (3-Cl)NP <sub>3</sub> FeNH <sub>2</sub>               | 4          | -313.5                             |
| (3-Cl)NP <sub>3</sub> FeNH <sub>3</sub> <sup>+</sup>  | 4          | -370.0                             |
| (3-Cl)NP <sub>3</sub> Fe <sup>+</sup>                 | 4          | -391.6                             |
| (3-Cl)NP <sub>3</sub> Fe                              | 3          | -371.9                             |
| (3-Cl)NP <sub>3</sub> FeN <sub>2</sub>                | 3          | -378.5                             |
| (3-Cl)NP <sub>3</sub> FeN <sub>2</sub> <sup>-</sup>   | 4          | -338.6                             |

**Table S11.** Gibbs free energies and relative Gibbs free energy data of the intermediates in the catalytic cycle of (4-Cl)NP<sub>3</sub>FeN<sub>2</sub><sup>-</sup>. Relative Gibbs free energies  $G_{\text{rel}}$  were calculated based on the following equation:

$$G_{\text{rel}}[\text{kcal/mol}] = G - G((4\text{-Cl})\text{NP}_3\text{FeN}_2^-) + n_{\text{H}^+}[\Delta G(\text{H}^+) - 2.24] + n_{\text{e}^-}[\Delta G(\text{e}^-) - 1.97] + n_{\text{NH}_3}[\Delta G(\text{NH}_3) - 1.28 + \Delta G(\text{NH}_3 \rightarrow \text{NH}_4^+) - 2.24] - n_{\text{N}_2}[\Delta G(\text{N}_2) - 1.28]$$

where  $G$ ,  $G((4\text{-Cl})\text{NP}_3\text{FeN}_2^-)$ ,  $G(\text{NH}_3)$  and  $G(\text{N}_2)$  denote the Gibbs free energy of a given intermediate (in the most stable spin state), the catalyst ((4-Cl)NP<sub>3</sub>FeN<sub>2</sub><sup>-</sup>), the ammonia molecule and the dinitrogen molecule, respectively;  $\Delta G(\text{H}^+)$ ,  $\Delta G(\text{e}^-)$  and  $\Delta G(\text{NH}_3 \rightarrow \text{NH}_4^+)$  represent the Gibbs free energy of proton release, electron release and ammonia protonation, respectively, the calculation of which is presented in Table S;  $n_{\text{H}^+}$ ,  $n_{\text{e}^-}$ ,  $n_{\text{NH}_3}$  and  $n_{\text{N}_2}$  stand for the number of particles added to (H<sup>+</sup>, e<sup>-</sup>, N<sub>2</sub>) or released from (NH<sub>3</sub>) the initial catalyst complex until the given intermediate is formed. Numerical corrections account for the liquid-phase concentrations and the excess amount of acid and reductant.

| Complex                                               | Spin State | $\Delta G_{\text{rel}}$ [kcal/mol] |
|-------------------------------------------------------|------------|------------------------------------|
| (4-Cl)NP <sub>3</sub> FeN <sub>2</sub> <sup>-</sup>   | 4          | 0.0                                |
| (4-Cl)NP <sub>3</sub> FeNNH                           | 4          | -49.3                              |
| (4-Cl)NP <sub>3</sub> FeNNH <sub>2</sub> <sup>+</sup> | 4          | -101.6                             |
| (4-Cl)NP <sub>3</sub> FeNNH <sub>2</sub>              | 3          | -89.4                              |
| (4-Cl)NP <sub>3</sub> FeNNH <sub>3</sub> <sup>+</sup> | 1          | -153.9                             |
| (4-Cl)NP <sub>3</sub> FeN <sup>+</sup>                | 1          | -188.0                             |
| (4-Cl)NP <sub>3</sub> FeN                             | 2          | -174.4                             |
| (4-Cl)NP <sub>3</sub> FeNH <sup>+</sup>               | 6          | -236.0                             |
| (4-Cl)NP <sub>3</sub> FeNH                            | 3          | -233.6                             |
| (4-Cl)NP <sub>3</sub> FeNH <sub>2</sub> <sup>+</sup>  | 5          | -319.3                             |
| (4-Cl)NP <sub>3</sub> FeNH <sub>2</sub>               | 4          | -313.1                             |
| (4-Cl)NP <sub>3</sub> FeNH <sub>3</sub> <sup>+</sup>  | 4          | -371.0                             |
| (4-Cl)NP <sub>3</sub> Fe <sup>+</sup>                 | 4          | -398.9                             |
| (4-Cl)NP <sub>3</sub> Fe                              | 3          | -378.2                             |

|                                          |   |        |
|------------------------------------------|---|--------|
| $(4\text{-Cl})\text{NP}_3\text{FeN}_2$   | 1 | -378.9 |
| $(4\text{-Cl})\text{NP}_3\text{FeN}_2^-$ | 4 | -338.6 |

### 2.3. Bond lengths

**Table S12.** Bond lengths in Å for the different intermediates involved in the catalytic cycle of BP<sub>3</sub>Fe

|                                                    | Fe-N  | N-N   | Fe-B  | Fe-P  | Fe-P  | Fe-P  | AVG Fe-P |
|----------------------------------------------------|-------|-------|-------|-------|-------|-------|----------|
| <b>BP<sub>3</sub>FeN<sub>2</sub><sup>-</sup></b>   | 1.751 | 1.159 | 2.286 | 2.195 | 2.201 | 2.236 | 2.211    |
| <b>BP<sub>3</sub>FeNNH</b>                         | 1.786 | 1.237 | 2.244 | 2.319 | 2.346 | 2.321 | 2.329    |
| <b>BP<sub>3</sub>FeNNH<sub>2</sub><sup>+</sup></b> | 1.747 | 1.272 | 2.463 | 2.337 | 2.374 | 2.392 | 2.368    |
| <b>BP<sub>3</sub>FeNNH<sub>2</sub></b>             | 1.721 | 1.292 | 2.341 | 2.230 | 2.230 | 2.347 | 2.269    |
| <b>BP<sub>3</sub>FeNNH<sub>3</sub><sup>+</sup></b> | 1.804 | 1.416 | 2.442 | 2.360 | 2.416 | 2.389 | 2.388    |
| <b>BP<sub>3</sub>FeN<sup>+</sup></b>               | 1.506 | -     | 2.925 | 2.243 | 2.246 | 2.247 | 2.245    |
| <b>BP<sub>3</sub>FeN</b>                           | 1.539 | -     | 2.679 | 2.214 | 2.216 | 2.217 | 2.216    |
| <b>BP<sub>3</sub>FeNH<sup>+</sup></b>              | 1.747 | -     | 2.551 | 2.385 | 2.389 | 2.391 | 2.388    |
| <b>BP<sub>3</sub>FeNH</b>                          | 1.779 | -     | 2.289 | 2.354 | 2.356 | 2.354 | 2.355    |
| <b>BP<sub>3</sub>FeNH<sub>2</sub><sup>+</sup></b>  | 1.864 | -     | 2.661 | 2.377 | 2.389 | 2.389 | 2.385    |
| <b>BP<sub>3</sub>FeNH<sub>2</sub></b>              | 1.910 | -     | 2.409 | 2.316 | 2.326 | 2.348 | 2.330    |
| <b>BP<sub>3</sub>FeNH<sub>3</sub><sup>+</sup></b>  | 2.133 | -     | 2.444 | 2.338 | 2.388 | 2.348 | 2.358    |
| <b>BP<sub>3</sub>Fe<sup>+</sup></b>                | -     | -     | 2.132 | 2.298 | 2.360 | 2.349 | 2.336    |
| <b>BP<sub>3</sub>Fe</b>                            | -     | -     | 2.376 | 2.253 | 2.255 | 2.258 | 2.255    |
| <b>BP<sub>3</sub>FeN<sub>2</sub></b>               | 1.784 | 1.148 | 2.270 | 2.303 | 2.304 | 2.304 | 2.304    |

**Table S13.** Bond lengths in Å for the different intermediates involved in the catalytic cycle of GaP<sub>3</sub>Fe

|                                                     | Fe-N  | N-N   | Fe-Ga | Fe-P  | Fe-P  | Fe-P  | AVG Fe-P |
|-----------------------------------------------------|-------|-------|-------|-------|-------|-------|----------|
| <b>GaP<sub>3</sub>FeN<sub>2</sub><sup>-</sup></b>   | 1.740 | 1.161 | 2.480 | 2.216 | 2.235 | 2.250 | 2.234    |
| <b>GaP<sub>3</sub>FeNNH</b>                         | 1.775 | 1.239 | 2.572 | 2.334 | 2.344 | 2.352 | 2.343    |
| <b>GaP<sub>3</sub>FeNNH<sub>2</sub><sup>+</sup></b> | 1.739 | 1.273 | 2.688 | 2.367 | 2.412 | 2.415 | 2.398    |
| <b>GaP<sub>3</sub>FeNNH<sub>2</sub></b>             | 1.715 | 1.289 | 2.572 | 2.238 | 2.272 | 2.328 | 2.279    |
| <b>GaP<sub>3</sub>FeNNH<sub>3</sub><sup>+</sup></b> | 1.794 | 1.414 | 2.651 | 2.396 | 2.463 | 2.417 | 2.425    |
| <b>GaP<sub>3</sub>FeN<sup>+</sup></b>               | 1.504 | -     | 2.955 | 2.262 | 2.271 | 2.269 | 2.267    |
| <b>GaP<sub>3</sub>FeN</b>                           | 1.546 | -     | 2.751 | 2.229 | 2.234 | 2.233 | 2.232    |
| <b>GaP<sub>3</sub>FeNH<sup>+</sup></b>              | 1.747 | -     | 2.740 | 2.427 | 2.434 | 2.431 | 2.431    |
| <b>GaP<sub>3</sub>FeNH</b>                          | 1.763 | -     | 2.576 | 2.354 | 2.413 | 2.372 | 2.380    |
| <b>GaP<sub>3</sub>FeNH<sub>2</sub><sup>+</sup></b>  | 1.865 | -     | 2.731 | 2.417 | 2.432 | 2.421 | 2.423    |
| <b>GaP<sub>3</sub>FeNH<sub>2</sub></b>              | 1.902 | -     | 2.591 | 2.365 | 2.371 | 2.338 | 2.358    |
| <b>GaP<sub>3</sub>FeNH<sub>3</sub><sup>+</sup></b>  | 2.104 | -     | 2.606 | 2.350 | 2.406 | 2.386 | 2.381    |
| <b>GaP<sub>3</sub>Fe<sup>+</sup></b>                | -     | -     | 2.576 | 2.330 | 2.362 | 2.362 | 2.351    |
| <b>GaP<sub>3</sub>Fe</b>                            | -     | -     | 2.498 | 2.255 | 2.255 | 2.256 | 2.255    |
| <b>GaP<sub>3</sub>FeN<sub>2</sub></b>               | 1.781 | 1.148 | 2.524 | 2.310 | 2.316 | 2.314 | 2.313    |

**Table S14.** Bond lengths in Å for the different intermediates involved in the catalytic cycle of AlP<sub>3</sub>Fe

|                                                   | Fe-N  | N-N   | Fe-Al | Fe-P  | Fe-P  | Fe-P  | AVG Fe-P |
|---------------------------------------------------|-------|-------|-------|-------|-------|-------|----------|
| <b>AlP<sub>3</sub>FeN<sub>2</sub><sup>-</sup></b> | 1.744 | 1.159 | 2.487 | 2.203 | 2.221 | 2.238 | 2.221    |
| <b>AlP<sub>3</sub>FeNNH</b>                       | 1.782 | 1.238 | 2.586 | 2.326 | 2.337 | 2.340 | 2.334    |

|                                |       |       |       |       |       |       |       |
|--------------------------------|-------|-------|-------|-------|-------|-------|-------|
| $\text{AIP}_3\text{FeNNH}_2^+$ | 1.741 | 1.271 | 2.669 | 2.370 | 2.410 | 2.417 | 2.399 |
| $\text{AIP}_3\text{FeNNH}_2$   | 1.716 | 1.288 | 2.569 | 2.238 | 2.273 | 2.323 | 2.278 |
| $\text{AIP}_3\text{FeNNH}_3^+$ | 1.795 | 1.414 | 2.666 | 2.393 | 2.468 | 2.419 | 2.427 |
| $\text{AIP}_3\text{FeN}^+$     | 1.504 | -     | 2.963 | 2.263 | 2.274 | 2.272 | 2.270 |
| $\text{AIP}_3\text{FeN}$       | 1.548 | -     | 2.720 | 2.228 | 2.234 | 2.233 | 2.232 |
| $\text{AIP}_3\text{FeNH}^+$    | 1.747 | -     | 2.764 | 2.432 | 2.440 | 2.438 | 2.437 |
| $\text{AIP}_3\text{FeNH}$      | 1.766 | -     | 2.603 | 2.344 | 2.416 | 2.370 | 2.377 |
| $\text{AIP}_3\text{FeNH}_2^+$  | 1.865 | -     | 2.736 | 2.422 | 2.436 | 2.425 | 2.428 |
| $\text{AIP}_3\text{FeNH}_2$    | 1.905 | -     | 2.616 | 2.346 | 2.357 | 2.373 | 2.359 |
| $\text{AIP}_3\text{FeNH}_3^+$  | 2.104 | -     | 2.601 | 2.346 | 2.402 | 2.386 | 2.378 |
| $\text{AIP}_3\text{Fe}^+$      | -     | -     | 2.564 | 2.327 | 2.366 | 2.358 | 2.350 |
| $\text{AIP}_3\text{Fe}$        | -     | -     | 2.460 | 2.249 | 2.253 | 2.250 | 2.251 |
| $\text{AIP}_3\text{FeN}_2$     | 1.782 | 1.147 | 2.540 | 2.308 | 2.314 | 2.312 | 2.311 |

**Table S15.** Bond lengths in Å for the different intermediates involved in the catalytic cycle of  $\text{NP}_3\text{Fe}$

|                               | Fe-N  | N-N   | Fe-<br>$\text{N}_{\text{anchor}}$ | Fe-P  | Fe-P  | Fe-P  | AVG Fe-P |
|-------------------------------|-------|-------|-----------------------------------|-------|-------|-------|----------|
| $\text{NP}_3\text{FeN}_2^-$   | 1.764 | 1.160 | 2.827                             | 2.227 | 2.283 | 2.232 | 2.247    |
| $\text{NP}_3\text{FeNNH}$     | 1.773 | 1.250 | 2.916                             | 2.254 | 2.333 | 2.238 | 2.275    |
| $\text{NP}_3\text{FeNNH}_2^+$ | 1.732 | 1.278 | 2.835                             | 2.287 | 2.397 | 2.327 | 2.337    |
| $\text{NP}_3\text{FeNNH}_2$   | 1.627 | 1.353 | 3.303                             | 2.169 | 2.184 | 2.194 | 2.182    |
| $\text{NP}_3\text{FeNNH}_3^+$ | 1.812 | 1.400 | 2.884                             | 2.342 | 2.344 | 2.422 | 2.369    |
| $\text{NP}_3\text{FeN}^+$     | 1.517 | -     | 2.483                             | 2.221 | 2.223 | 2.223 | 2.222    |
| $\text{NP}_3\text{FeN}$       | 1.561 | -     | 2.487                             | 2.194 | 2.210 | 2.219 | 2.208    |
| $\text{NP}_3\text{FeNH}^+$    | 1.754 | -     | 2.751                             | 2.410 | 2.416 | 2.421 | 2.416    |
| $\text{NP}_3\text{FeNH}$      | 1.759 | -     | 2.911                             | 2.290 | 2.360 | 2.325 | 2.325    |
| $\text{NP}_3\text{FeNH}_2^+$  | 1.881 | -     | 2.894                             | 2.374 | 2.405 | 2.381 | 2.387    |
| $\text{NP}_3\text{FeNH}_2$    | 1.917 | -     | 2.955                             | 2.257 | 2.281 | 2.272 | 2.270    |
| $\text{NP}_3\text{FeNH}_3^+$  | 2.137 | -     | 2.839                             | 2.293 | 2.297 | 2.297 | 2.296    |
| $\text{NP}_3\text{Fe}^+$      | -     | -     | 2.088                             | 2.257 | 2.260 | 2.262 | 2.260    |
| $\text{NP}_3\text{Fe}$        | -     | -     | 2.343                             | 2.179 | 2.215 | 2.183 | 2.192    |
| $\text{NP}_3\text{FeN}_2$     | 1.774 | 1.154 | 2.799                             | 2.228 | 2.23  | 2.257 | 2.238    |

**Table S16.** Bond lengths in Å for the different intermediates involved in the catalytic cycle of  $\text{PP}_3\text{Fe}$

|                               | Fe-N  | N-N   | Fe-<br>$\text{P}_{\text{anchor}}$ | Fe-P  | Fe-P  | Fe-P  | AVG Fe-P |
|-------------------------------|-------|-------|-----------------------------------|-------|-------|-------|----------|
| $\text{PP}_3\text{FeN}_2^-$   | 1.745 | 1.156 | 2.165                             | 2.183 | 2.194 | 2.190 | 2.189    |
| $\text{PP}_3\text{FeNNH}$     | 1.740 | 1.233 | 2.134                             | 2.199 | 2.227 | 2.209 | 2.212    |
| $\text{PP}_3\text{FeNNH}_2^+$ | 1.726 | 1.292 | 2.204                             | 2.243 | 2.307 | 2.250 | 2.267    |
| $\text{PP}_3\text{FeNNH}_2$   | 1.785 | 1.309 | 2.140                             | 2.181 | 2.227 | 2.186 | 2.198    |
| $\text{PP}_3\text{FeNNH}_3^+$ | 1.815 | 1.458 | 2.208                             | 2.253 | 2.318 | 2.289 | 2.287    |

|                                                   |       |       |       |       |       |       |       |
|---------------------------------------------------|-------|-------|-------|-------|-------|-------|-------|
| <b>PP<sub>3</sub>FeN<sup>+</sup></b>              | 1.553 | -     | 2.317 | 2.234 | 2.238 | 2.237 | 2.236 |
| <b>PP<sub>3</sub>FeN</b>                          | 1.597 | -     | 2.283 | 2.191 | 2.244 | 2.235 | 2.223 |
| <b>PP<sub>3</sub>FeNH<sup>+</sup></b>             | 1.678 | -     | 2.238 | 2.214 | 2.231 | 2.325 | 2.257 |
| <b>PP<sub>3</sub>FeNH</b>                         | 1.772 | -     | 2.173 | 2.205 | 2.231 | 2.241 | 2.226 |
| <b>PP<sub>3</sub>FeNH<sub>2</sub><sup>+</sup></b> | 1.857 | -     | 2.183 | 2.284 | 2.313 | 2.297 | 2.298 |
| <b>PP<sub>3</sub>FeNH<sub>2</sub></b>             | 1.864 | -     | 2.151 | 2.237 | 2.279 | 2.250 | 2.255 |
| <b>PP<sub>3</sub>FeNH<sub>3</sub><sup>+</sup></b> | 2.042 | -     | 2.108 | 2.235 | 2.277 | 2.244 | 2.252 |
| <b>PP<sub>3</sub>Fe<sup>+</sup></b>               | -     | -     | 2.196 | 2.297 | 2.297 | 2.302 | 2.299 |
| <b>PP<sub>3</sub>Fe</b>                           | -     | -     | 2.228 | 2.221 | 2.216 | 2.210 | 2.216 |
| <b>PP<sub>3</sub>FeN<sub>2</sub></b>              | 1.763 | 1.152 | 2.244 | 2.277 | 2.278 | 2.279 | 2.278 |

## 2.4. ADCH charges

**Table S17.** ADCH charges for the different intermediates involved in the catalytic cycle of BP<sub>3</sub>Fe

|                                                    | Fe     | N1     | N2     | P     | P     | P     | AVG P | B      |
|----------------------------------------------------|--------|--------|--------|-------|-------|-------|-------|--------|
| <b>BP<sub>3</sub>FeN<sub>2</sub><sup>-</sup></b>   | -0.373 | 0.173  | -0.308 | 0.146 | 0.185 | 0.202 | 0.177 | -0.092 |
| <b>BP<sub>3</sub>FeNNH</b>                         | -0.125 | -0.034 | -0.380 | 0.204 | 0.202 | 0.201 | 0.202 | -0.085 |
| <b>BP<sub>3</sub>FeNNH<sub>2</sub><sup>+</sup></b> | -0.044 | -0.129 | -0.286 | 0.193 | 0.192 | 0.194 | 0.193 | -0.038 |
| <b>BP<sub>3</sub>FeNNH<sub>2</sub></b>             | -0.248 | -0.086 | -0.331 | 0.149 | 0.172 | 0.207 | 0.176 | -0.202 |
| <b>BP<sub>3</sub>FeNNH<sub>3</sub><sup>+</sup></b> | -0.013 | -0.397 | -0.123 | 0.185 | 0.187 | 0.199 | 0.190 | -0.051 |
| <b>BP<sub>3</sub>FeN<sup>+</sup></b>               | -0.165 | -0.141 | -      | 0.219 | 0.217 | 0.217 | 0.218 | 0.100  |
| <b>BP<sub>3</sub>FeN</b>                           | -0.225 | -0.219 | -      | 0.208 | 0.209 | 0.207 | 0.208 | 0.041  |
| <b>BP<sub>3</sub>FeNH<sup>+</sup></b>              | 0.007  | -0.394 | -      | 0.199 | 0.189 | 0.196 | 0.195 | 0.048  |
| <b>BP<sub>3</sub>FeNH</b>                          | -0.067 | -0.426 | -      | 0.208 | 0.208 | 0.207 | 0.208 | -0.072 |
| <b>BP<sub>3</sub>FeNH<sub>2</sub><sup>+</sup></b>  | 0.043  | -0.680 | -      | 0.194 | 0.175 | 0.189 | 0.186 | 0.083  |
| <b>BP<sub>3</sub>FeNH<sub>2</sub></b>              | -0.032 | -0.707 | -      | 0.198 | 0.162 | 0.208 | 0.189 | -0.060 |
| <b>BP<sub>3</sub>FeNH<sub>3</sub><sup>+</sup></b>  | -0.073 | -0.454 | -      | 0.165 | 0.168 | 0.180 | 0.171 | -0.056 |
| <b>BP<sub>3</sub>Fe<sup>+</sup></b>                | -0.019 | -      | -      | 0.187 | 0.191 | 0.170 | 0.183 | -0.067 |
| <b>BP<sub>3</sub>Fe</b>                            | -0.084 | -      | -      | 0.169 | 0.171 | 0.172 | 0.171 | -0.116 |
| <b>BP<sub>3</sub>FeN<sub>2</sub></b>               | -0.198 | 0.104  | -0.155 | 0.194 | 0.195 | 0.194 | 0.194 | -0.088 |

**Table S18.** ADCH charges for the different intermediates involved in the catalytic cycle of GaP<sub>3</sub>Fe

|                                                     | Fe     | N1     | N2     | P     | P     | P     | AVG P | Ga    |
|-----------------------------------------------------|--------|--------|--------|-------|-------|-------|-------|-------|
| <b>GaP<sub>3</sub>FeN<sub>2</sub><sup>-</sup></b>   | -0.435 | 0.187  | -0.306 | 0.139 | 0.174 | 0.188 | 0.167 | 0.154 |
| <b>GaP<sub>3</sub>FeNNH</b>                         | -0.183 | -0.044 | -0.343 | 0.192 | 0.190 | 0.182 | 0.188 | 0.163 |
| <b>GaP<sub>3</sub>FeNNH<sub>2</sub><sup>+</sup></b> | -0.123 | -0.201 | -0.014 | 0.180 | 0.188 | 0.191 | 0.187 | 0.223 |
| <b>GaP<sub>3</sub>FeNNH<sub>2</sub></b>             | -0.189 | -0.413 | 0.040  | 0.146 | 0.186 | 0.211 | 0.181 | 0.162 |
| <b>GaP<sub>3</sub>FeNNH<sub>3</sub><sup>+</sup></b> | -0.074 | -0.393 | -0.121 | 0.178 | 0.188 | 0.192 | 0.186 | 0.188 |
| <b>GaP<sub>3</sub>FeN<sup>+</sup></b>               | -0.209 | -0.100 | -      | 0.211 | 0.210 | 0.211 | 0.211 | 0.336 |
| <b>GaP<sub>3</sub>FeN</b>                           | -0.282 | -0.191 | -      | 0.197 | 0.196 | 0.195 | 0.196 | 0.232 |
| <b>GaP<sub>3</sub>FeNH<sup>+</sup></b>              | -0.033 | -0.366 | -      | 0.186 | 0.190 | 0.197 | 0.191 | 0.284 |
| <b>GaP<sub>3</sub>FeNH</b>                          | -0.100 | -0.477 | -      | 0.200 | 0.189 | 0.193 | 0.194 | 0.164 |
| <b>GaP<sub>3</sub>FeNH<sub>2</sub><sup>+</sup></b>  | 0.011  | -0.653 | -      | 0.195 | 0.175 | 0.184 | 0.185 | 0.256 |
| <b>GaP<sub>3</sub>FeNH<sub>2</sub></b>              | -0.109 | -0.647 | -      | 0.192 | 0.155 | 0.196 | 0.181 | 0.157 |
| <b>GaP<sub>3</sub>FeNH<sub>3</sub><sup>+</sup></b>  | -0.156 | -0.430 | -      | 0.168 | 0.162 | 0.180 | 0.170 | 0.191 |
| <b>GaP<sub>3</sub>Fe<sup>+</sup></b>                | -0.003 | -      | -      | 0.180 | 0.183 | 0.152 | 0.172 | 0.187 |
| <b>GaP<sub>3</sub>Fe</b>                            | -0.117 | -      | -      | 0.161 | 0.160 | 0.162 | 0.161 | 0.085 |
| <b>GaP<sub>3</sub>FeN<sub>2</sub></b>               | -0.276 | 0.146  | -0.101 | 0.179 | 0.179 | 0.179 | 0.179 | 0.135 |

**Table S19.** ADCH charges for the different intermediates involved in the catalytic cycle of AlP<sub>3</sub>Fe

|                                                   | Fe     | N1     | N2     | P     | P     | P     | AVG P | Al    |
|---------------------------------------------------|--------|--------|--------|-------|-------|-------|-------|-------|
| <b>AlP<sub>3</sub>FeN<sub>2</sub><sup>-</sup></b> | -0.440 | 0.187  | -0.301 | 0.185 | 0.139 | 0.172 | 0.165 | 0.145 |
| <b>AlP<sub>3</sub>FeNNH</b>                       | -0.198 | -0.047 | -0.329 | 0.193 | 0.190 | 0.184 | 0.189 | 0.180 |

|                                                     |        |        |        |       |       |       |       |       |
|-----------------------------------------------------|--------|--------|--------|-------|-------|-------|-------|-------|
| <b>AIP<sub>3</sub>FeNNH<sub>2</sub><sup>+</sup></b> | -0.117 | -0.228 | 0.097  | 0.184 | 0.189 | 0.197 | 0.190 | 0.211 |
| <b>AIP<sub>3</sub>FeNNH<sub>2</sub></b>             | -0.222 | -0.387 | 0.090  | 0.150 | 0.189 | 0.214 | 0.184 | 0.161 |
| <b>AIP<sub>3</sub>FeNNH<sub>3</sub><sup>+</sup></b> | -0.074 | -0.392 | -0.121 | 0.181 | 0.192 | 0.193 | 0.189 | 0.185 |
| <b>AIP<sub>3</sub>FeN<sup>+</sup></b>               | -0.204 | -0.099 | -      | 0.213 | 0.212 | 0.213 | 0.213 | 0.246 |
| <b>AIP<sub>3</sub>FeN</b>                           | -0.280 | -0.187 | -      | 0.199 | 0.199 | 0.197 | 0.198 | 0.215 |
| <b>AIP<sub>3</sub>FeNH<sup>+</sup></b>              | -0.024 | -0.361 | -      | 0.188 | 0.191 | 0.199 | 0.193 | 0.254 |
| <b>AIP<sub>3</sub>FeNH</b>                          | -0.106 | -0.480 | -      | 0.203 | 0.188 | 0.193 | 0.195 | 0.172 |
| <b>AIP<sub>3</sub>FeNH<sub>2</sub><sup>+</sup></b>  | 0.021  | -0.652 | -      | 0.197 | 0.177 | 0.188 | 0.187 | 0.232 |
| <b>AIP<sub>3</sub>FeNH<sub>2</sub></b>              | -0.121 | -0.624 | -      | 0.194 | 0.157 | 0.193 | 0.182 | 0.159 |
| <b>AIP<sub>3</sub>FeNH<sub>3</sub><sup>+</sup></b>  | -0.162 | -0.426 | -      | 0.172 | 0.162 | 0.182 | 0.172 | 0.191 |
| <b>AIP<sub>3</sub>Fe<sup>+</sup></b>                | 0.030  | -      | -      | 0.172 | 0.176 | 0.149 | 0.166 | 0.173 |
| <b>AIP<sub>3</sub>Fe</b>                            | -0.100 | -      | -      | 0.156 | 0.156 | 0.157 | 0.156 | 0.080 |
| <b>AIP<sub>3</sub>FeN<sub>2</sub></b>               | -0.280 | 0.117  | -0.073 | 0.173 | 0.174 | 0.175 | 0.174 | 0.148 |

**Table S20.** ADCH charges for the different intermediates involved in the catalytic cycle of NP<sub>3</sub>Fe

|                                                    | Fe     | N1     | N2     | P     | P     | P     | AVG P | N <sub>anchor</sub> |
|----------------------------------------------------|--------|--------|--------|-------|-------|-------|-------|---------------------|
| <b>NP<sub>3</sub>FeN<sub>2</sub><sup>-</sup></b>   | -0.293 | 0.077  | -0.347 | 0.120 | 0.183 | 0.189 | 0.164 | -0.032              |
| <b>NP<sub>3</sub>FeNNH</b>                         | -0.211 | -0.113 | -0.413 | 0.152 | 0.149 | 0.190 | 0.164 | -0.054              |
| <b>NP<sub>3</sub>FeNNH<sub>2</sub><sup>+</sup></b> | -0.069 | -0.305 | -0.151 | 0.141 | 0.179 | 0.180 | 0.167 | -0.067              |
| <b>NP<sub>3</sub>FeNNH<sub>2</sub></b>             | -0.319 | -0.204 | -0.498 | 0.162 | 0.159 | 0.164 | 0.162 | 0.005               |
| <b>NP<sub>3</sub>FeNNH<sub>3</sub><sup>+</sup></b> | -0.055 | -0.514 | -0.116 | 0.174 | 0.180 | 0.146 | 0.167 | -0.075              |
| <b>NP<sub>3</sub>FeN<sup>+</sup></b>               | -0.203 | -0.174 | -      | 0.205 | 0.203 | 0.204 | 0.204 | 0.000               |
| <b>NP<sub>3</sub>FeN</b>                           | -0.260 | -0.393 | -      | 0.178 | 0.190 | 0.190 | 0.186 | 0.014               |
| <b>NP<sub>3</sub>FeNH<sup>+</sup></b>              | 0.023  | -0.458 | -      | 0.165 | 0.163 | 0.165 | 0.164 | -0.065              |
| <b>NP<sub>3</sub>FeNH</b>                          | -0.082 | -0.685 | -      | 0.190 | 0.197 | 0.147 | 0.178 | -0.060              |
| <b>NP<sub>3</sub>FeNH<sub>2</sub><sup>+</sup></b>  | 0.070  | -0.821 | -      | 0.166 | 0.145 | 0.166 | 0.159 | -0.082              |
| <b>NP<sub>3</sub>FeNH<sub>2</sub></b>              | -0.153 | -0.759 | -      | 0.155 | 0.149 | 0.166 | 0.157 | -0.049              |
| <b>NP<sub>3</sub>FeNH<sub>3</sub><sup>+</sup></b>  | -0.213 | -0.439 | -      | 0.146 | 0.143 | 0.146 | 0.145 | -0.057              |
| <b>NP<sub>3</sub>Fe<sup>+</sup></b>                | -0.220 | -      | -      | 0.159 | 0.159 | 0.160 | 0.160 | 0.022               |
| <b>NP<sub>3</sub>Fe</b>                            | -0.359 | -      | -      | 0.118 | 0.136 | 0.142 | 0.132 | -0.001              |
| <b>NP<sub>3</sub>FeN<sub>2</sub></b>               | -0.359 | 0.200  | -0.359 | 0.180 | 0.120 | 0.174 | 0.158 | -0.034              |

**Table S21.** ADCH charges for the different intermediates involved in the catalytic cycle of PP<sub>3</sub>Fe

|                                                    | Fe     | N1     | N2     | P     | P     | P     | AVG P | P <sub>anchor</sub> |
|----------------------------------------------------|--------|--------|--------|-------|-------|-------|-------|---------------------|
| <b>PP<sub>3</sub>FeN<sub>2</sub><sup>-</sup></b>   | -0.459 | 0.103  | -0.219 | 0.162 | 0.163 | 0.162 | 0.163 | 0.174               |
| <b>PP<sub>3</sub>FeNNH</b>                         | -0.393 | -0.049 | -0.354 | 0.181 | 0.179 | 0.176 | 0.179 | 0.157               |
| <b>PP<sub>3</sub>FeNNH<sub>2</sub><sup>+</sup></b> | -0.282 | -0.209 | -0.177 | 0.202 | 0.191 | 0.192 | 0.195 | 0.154               |
| <b>PP<sub>3</sub>FeNNH<sub>2</sub></b>             | -0.404 | -0.335 | -0.234 | 0.181 | 0.151 | 0.173 | 0.168 | 0.148               |
| <b>PP<sub>3</sub>FeNNH<sub>3</sub><sup>+</sup></b> | -0.253 | -0.448 | -0.142 | 0.182 | 0.201 | 0.186 | 0.190 | 0.154               |
| <b>PP<sub>3</sub>FeN<sup>+</sup></b>               | -0.278 | -0.185 | -      | 0.214 | 0.213 | 0.213 | 0.213 | 0.163               |
| <b>PP<sub>3</sub>FeN</b>                           | -0.335 | -0.375 | -      | 0.193 | 0.189 | 0.189 | 0.190 | 0.173               |



|                                                   |        |        |        |       |       |       |       |       |
|---------------------------------------------------|--------|--------|--------|-------|-------|-------|-------|-------|
| <b>PP<sub>3</sub>FeNH<sup>+</sup></b>             | -0.234 | -0.376 | -      | 0.207 | 0.207 | 0.203 | 0.206 | 0.158 |
| <b>PP<sub>3</sub>FeNH</b>                         | -0.292 | -0.557 | -      | 0.188 | 0.197 | 0.186 | 0.191 | 0.159 |
| <b>PP<sub>3</sub>FeNH<sub>2</sub><sup>+</sup></b> | -0.180 | -0.646 | -      | 0.198 | 0.212 | 0.195 | 0.202 | 0.146 |
| <b>PP<sub>3</sub>FeNH<sub>2</sub></b>             | -0.316 | -0.680 | -      | 0.192 | 0.184 | 0.165 | 0.180 | 0.148 |
| <b>PP<sub>3</sub>FeNH<sub>3</sub><sup>+</sup></b> | -0.360 | -0.419 | -      | 0.146 | 0.180 | 0.191 | 0.172 | 0.138 |
| <b>PP<sub>3</sub>Fe<sup>+</sup></b>               | -0.181 | -      | -      | 0.179 | 0.177 | 0.179 | 0.178 | 0.056 |
| <b>PP<sub>3</sub>Fe</b>                           | -0.413 | -      | -      | 0.127 | 0.162 | 0.171 | 0.153 | 0.106 |
| <b>PP<sub>3</sub>FeN<sub>2</sub></b>              | -0.464 | 0.099  | -0.168 | 0.163 | 0.164 | 0.164 | 0.164 | 0.161 |

## 2.5. *cDFT indices*

**Table S22.** *cDFT* indices (electrophilicity, nucleophilicity, hardness, softness, and mulliken electronegativity indices) for intermediates prone to undergo reduction (all values are in eV)

| Anchor atom | Intermediate                                    | E Index | N Index | Hardness | Softness | Mulliken Electronegativity |
|-------------|-------------------------------------------------|---------|---------|----------|----------|----------------------------|
| B           | EP <sub>3</sub> FeNNH <sub>2</sub> <sup>+</sup> | 5.193   | -0.862  | 4.842    | 0.207    | 7.091                      |
|             | EP <sub>3</sub> FeN <sup>+</sup>                | 5.001   | -1.862  | 4.827    | 0.207    | 6.949                      |
|             | EP <sub>3</sub> FeNH <sup>+</sup>               | 5.462   | -1.357  | 4.487    | 0.223    | 7.001                      |
|             | EP <sub>3</sub> FeNH <sub>2</sub> <sup>+</sup>  | 3.745   | -1.29   | 5.54     | 0.181    | 6.442                      |
|             | EP <sub>3</sub> Fe <sup>+</sup>                 | 4.265   | -1.394  | 5.752    | 0.174    | 7.005                      |
|             | EP <sub>3</sub> FeN <sub>2</sub>                | 0.478   | 2.474   | 6.265    | 0.160    | 2.448                      |
| P           | EP <sub>3</sub> FeNNH <sub>2</sub> <sup>+</sup> | 3.157   | -0.366  | 5.462    | 0.183    | 5.663                      |
|             | EP <sub>3</sub> FeN <sup>+</sup>                | 3.198   | -1.616  | 5.804    | 0.172    | 6.093                      |
|             | EP <sub>3</sub> FeNH <sup>+</sup>               | 3.371   | -0.814  | 5.498    | 0.182    | 6.088                      |
|             | EP <sub>3</sub> FeNH <sub>2</sub> <sup>+</sup>  | 2.606   | -0.773  | 6.011    | 0.166    | 5.597                      |
|             | EP <sub>3</sub> Fe <sup>+</sup>                 | 3.19    | -0.362  | 5.195    | 0.193    | 5.757                      |
|             | EP <sub>3</sub> FeN <sub>2</sub>                | 0.4769  | 3.0013  | 4.656    | 0.2148   | 2.1073                     |
| N           | EP <sub>3</sub> FeNNH <sub>2</sub> <sup>+</sup> | 3.058   | 1.85    | 5.56     | 0.18     | 5.831                      |
|             | EP <sub>3</sub> FeN <sup>+</sup>                | 3.084   | -1.577  | 5.959    | 0.168    | 6.063                      |
|             | EP <sub>3</sub> FeNH <sup>+</sup>               | 4.11    | -1.09   | 5.009    | 0.2      | 6.417                      |
|             | EP <sub>3</sub> FeNH <sub>2</sub> <sup>+</sup>  | 2.543   | -1.029  | 6.484    | 0.154    | 5.743                      |
|             | EP <sub>3</sub> Fe <sup>+</sup>                 | 2.752   | -0.532  | 6.244    | 0.16     | 5.862                      |
|             | EP <sub>3</sub> FeN <sub>2</sub>                | 0.4389  | 3.7079  | 4.3956   | 0.2275   | 1.9643                     |
| Al          | EP <sub>3</sub> FeNNH <sub>2</sub> <sup>+</sup> | 4.807   | 1.094   | 4.867    | 0.206    | 6.84                       |
|             | EP <sub>3</sub> FeN <sup>+</sup>                | 5.565   | -2.042  | 4.657    | 0.215    | 7.2                        |
|             | EP <sub>3</sub> FeNH <sup>+</sup>               | 5.365   | -1.603  | 4.786    | 0.209    | 7.166                      |
|             | EP <sub>3</sub> FeNH <sub>2</sub> <sup>+</sup>  | 2.928   | -1.594  | 6.717    | 0.149    | 6.271                      |
|             | EP <sub>3</sub> Fe <sup>+</sup>                 | 4.173   | -1.463  | 6.014    | 0.166    | 7.084                      |
|             | EP <sub>3</sub> FeN <sub>2</sub>                | 0.4353  | 2.503   | 6.1899   | 0.1616   | 2.3214                     |
| Ga          | EP <sub>3</sub> FeNNH <sub>2</sub> <sup>+</sup> | 5.1159  | -1.384  | 4.9309   | 0.2028   | 7.103                      |
|             | EP <sub>3</sub> FeN <sup>+</sup>                | 5.4324  | -2.0047 | 4.6943   | 0.213    | 7.1416                     |
|             | EP <sub>3</sub> FeNH <sup>+</sup>               | 5.3105  | -1.5454 | 4.7539   | 0.2104   | 7.1057                     |
|             | EP <sub>3</sub> FeNH <sub>2</sub> <sup>+</sup>  | 3.0481  | -1.5299 | 6.4588   | 0.1548   | 6.2749                     |
|             | EP <sub>3</sub> Fe <sup>+</sup>                 | 4.0905  | -1.3364 | 5.9626   | 0.1677   | 6.9843                     |
|             | EP <sub>3</sub> FeN <sub>2</sub>                | 0.4484  | 2.4857  | 6.2664   | 0.1596   | 2.3706                     |

## 2.6. Binding affinities (A)

**Table S23.** N<sub>2</sub> and H<sub>2</sub> binding affinities (A) in kcal/mol for the different anchor atom complexes.

| Complex             | N <sub>2</sub> Binding Affinity<br>(kcal/mol) | H <sub>2</sub> Binding Affinity<br>(kcal/mol) |
|---------------------|-----------------------------------------------|-----------------------------------------------|
| BP <sub>3</sub> Fe  | 2.5                                           | -1.4                                          |
| CP <sub>3</sub> Fe  | -0.6                                          | -11.3                                         |
| SiP <sub>3</sub> Fe | 11.3                                          | 3.1                                           |
| AlP <sub>3</sub> Fe | 2.6                                           | 0.5                                           |
| GaP <sub>3</sub> Fe | 2.9                                           | 1.5                                           |
| NP <sub>3</sub> Fe  | 8.8                                           | 7.1                                           |
| PP <sub>3</sub> Fe  | 19.7                                          | 18.5                                          |

## 2.7. Orbital energies

**Table S24.** EP<sub>3</sub>FeNNH<sub>2</sub><sup>+</sup> LUMO and EP<sub>3</sub>FeNNH<sub>2</sub> HOMO alpha orbital energies (calculated at ωB97xD/TZVP level of theory) across various anchor atom complexes (all energies are in eV).

| Complex                                                | Alpha HOMO | Alpha LUMO | Alpha Gap | Beta HOMO | Beta LUMO | Beta Gap |
|--------------------------------------------------------|------------|------------|-----------|-----------|-----------|----------|
| BP <sub>3</sub> FeNNH <sub>2</sub>                     | -6.510     | 1.055      | 7.565     | -6.474    | 0.959     | 7.433    |
| BP <sub>3</sub> FeNNH <sub>2</sub> <sup>+</sup>        | -8.585     | -0.227     | 8.359     | -7.952    | -0.962    | 6.990    |
| AlP <sub>3</sub> FeNNH <sub>2</sub>                    | -6.504     | 1.159      | 7.663     | -6.684    | 0.790     | 7.474    |
| AlP <sub>3</sub> FeNNH <sub>2</sub> <sup>+</sup>       | -8.572     | -0.231     | 8.341     | -8.557    | -1.130    | 7.427    |
| NP <sub>3</sub> FeNNH <sub>2</sub>                     | -5.656     | 0.984      | 6.640     | -5.615    | 0.880     | 6.495    |
| NP <sub>3</sub> FeNNH <sub>2</sub> <sup>+</sup>        | -7.816     | 0.053      | 7.869     | -7.980    | -0.243    | 7.737    |
| PP <sub>3</sub> FeNNH <sub>2</sub>                     | -5.614     | 0.812      | 6.425     | -         | -         | -        |
| PP <sub>3</sub> FeNNH <sub>2</sub> <sup>+</sup>        | -7.799     | -0.116     | 7.683     | -7.470    | -0.150    | 7.320    |
| N(Cl-1) P <sub>3</sub> FeNNH <sub>2</sub>              | -6.369     | 0.749      | 7.117     | -         | -         | -        |
| N(Cl-1) P <sub>3</sub> FeNNH <sub>2</sub> <sup>+</sup> | -8.001     | -0.183     | 7.818     | -8.172    | -0.429    | 7.743    |
| N(Cl-2) P <sub>3</sub> FeNNH <sub>2</sub>              | -6.392     | 0.676      | 7.068     | -         | -         | -        |
| N(Cl-2) P <sub>3</sub> FeNNH <sub>2</sub> <sup>+</sup> | -8.000     | -0.249     | 7.752     | -8.075    | -0.446    | 7.629    |
| N(Cl-3) P <sub>3</sub> FeNNH <sub>2</sub>              | -6.417     | 0.666      | 7.083     | -         | -         | -        |
| N(Cl-3) P <sub>3</sub> FeNNH <sub>2</sub> <sup>+</sup> | -8.019     | -0.255     | 7.764     | -8.114    | -0.470    | 7.644    |
| N(Cl-4) P <sub>3</sub> FeNNH <sub>2</sub>              | -6.359     | 0.658      | 7.016     | -         | -         | -        |
| N(Cl-4) P <sub>3</sub> FeNNH <sub>2</sub> <sup>+</sup> | -7.894     | -0.318     | 7.576     | -7.989    | -0.435    | 7.554    |
